# Supplementary material for: Comparison of the Micronaut-AM System and the EUCAST Broth Microdilution Reference Method for MIC Determination of Four Antifungals against Aspergillus fumigatus
Source: MDPI journal article supplement (doi:10.3390/jof9070721), 2023-06-30
Supplement: s1 [file s1]

**Table S1.** Comparison of MICs (mg/L) and categories for 61 azole-susceptible isolates.

| N° isolate | Voriconazole |          |     | Itraconazole |         |     | Posaconazole |           |     |
|------------|--------------|----------|-----|--------------|---------|-----|--------------|-----------|-----|
|            | MIC (mg/L)   |          | C   | MIC (mg/L)   |         | C   | MIC (mg/L)   |           | C   |
|            | E            | M        | E/M | E            | M       | E/M | E            | M         | E/M |
| 1          | 0.25         | 0.0625   | S/S | 0.25         | 0.03125 | S/S | 0.125        | 0.015625  | S/S |
| 2          | 0.25         | 0.0625   | S/S | 0.25         | 0.0625  | S/S | 0.25         | 0.015625  | S/S |
| 3          | 0.25         | 0.0625   | S/S | 0.25         | 0.0625  | S/S | 0.125        | 0.015625  | S/S |
| 4          | 0.5          | 0.125    | S/S | 0.125        | 0.0625  | S/S | 0.0625       | 0.03125   | S/S |
| 5          | 0.25         | 0.0625   | S/S | 0.125        | 0.0625  | S/S | 0.125        | 0.015625  | S/S |
| 6          | 0.5          | 0.03125  | S/S | 0.5          | 0.03125 | S/S | 0.125        | 0.015625  | S/S |
| 7          | 0.25         | 0.0625   | S/S | 0.25         | 0.25    | S/S | 0.125        | 0.015625  | S/S |
| 8          | 0.5          | 0.03125  | S/S | 0.25         | 0.03125 | S/S | 0.125        | 0.015625  | S/S |
| 9          | 0.25         | 0.0625   | S/S | 0.25         | 0.03125 | S/S | 0.125        | 0.015625  | S/S |
| 10         | 0.25         | 0.03125  | S/S | 0.25         | 0.03125 | S/S | 0.125        | 0.015625  | S/S |
| 11         | 0.25         | 0.0625   | S/S | 0.25         | 0.03125 | S/S | 0.0625       | 0.015625  | S/S |
| 12         | 0.125        | 0.0625   | S/S | 0.0625       | 0.0625  | S/S | 0.0625       | 0.015625  | S/S |
| 13         | 0.5          | 0.0625   | S/S | 0.25         | 0.0625  | S/S | 0.25         | 0.03125   | S/S |
| 14         | 0.25         | 0.0625   | S/S | 0.25         | 0.03125 | S/S | 0.125        | 0.03125   | S/S |
| 15         | 0.125        | 0.03125  | S/S | 0.25         | 0.03125 | S/S | 0.125        | 0.015625  | S/S |
| 16         | 0.25         | 0.0625   | S/S | 0.25         | 0.03125 | S/S | 0.125        | 0.015625  | S/S |
| 17         | 0.5          | 0.03125  | S/S | 0.25         | 0.03125 | S/S | 0.125        | 0.015625  | S/S |
| 18         | 0.25         | 0.0625   | S/S | 0.25         | 0.0625  | S/S | 0.125        | 0.015625  | S/S |
| 19         | 0.5          | 0.125    | S/S | 0.25         | 0.0625  | S/S | 0.25         | 0.03125   | S/S |
| 20         | 0.125        | 0.03125  | S/S | 0.5          | 0.03125 | S/S | 0.125        | 0.0078125 | S/S |
| 21         | 0.125        | 0.03125  | S/S | 0.015625     | 0.03125 | S/S | 0.0625       | 0.015625  | S/S |
| 22         | 0.5          | 0.0625   | S/S | 0.25         | 0.0625  | S/S | 0.125        | 0.015625  | S/S |
| 23         | 0.25         | 0.0625   | S/S | 0.5          | 0.0625  | S/S | 0.125        | 0.03125   | S/S |
| 24         | 0.5          | 0.03125  | S/S | 0.25         | 0.03125 | S/S | 0.25         | 0.015625  | S/S |
| 25         | 0.25         | 0.03125  | S/S | 0.25         | 0.03125 | S/S | 0.125        | 0.015625  | S/S |
| 26         | 0.25         | 0.03125  | S/S | 0.25         | 0.03125 | S/S | 0.125        | 0.015625  | S/S |
| 27         | 0.25         | 0.03125  | S/S | 0.25         | 0.0625  | S/S | 0.25         | 0.0078125 | S/S |
| 28         | 0.25         | 0.0625   | S/S | 0.125        | 0.03125 | S/S | 0.125        | 0.015625  | S/S |
| 29         | 0.25         | 0.015625 | S/S | 0.25         | 0.03125 | S/S | 0.125        | 0.015625  | S/S |

|    |        |          |     |       |         |     |       |           |     |
|----|--------|----------|-----|-------|---------|-----|-------|-----------|-----|
| 30 | 0.125  | 0.0625   | S/S | 0.5   | 0.0625  | S/S | 0.125 | 0.03125   | S/S |
| 31 | 0.125  | 0.015625 | S/S | 0.25  | 0.03125 | S/S | 0.125 | 0.015625  | S/S |
| 32 | 0.25   | 0.03125  | S/S | 0.25  | 0.0625  | S/S | 0.125 | 0.015625  | S/S |
| 33 | 0.25   | 0.0625   | S/S | 0.5   | 0.0625  | S/S | 0.125 | 0.015625  | S/S |
| 34 | 0.25   | 0.0625   | S/S | 0.25  | 0.125   | S/S | 0.25  | 0.015625  | S/S |
| 35 | 0.25   | 0.0625   | S/S | 0.25  | 0.0625  | S/S | 0.125 | 0.015625  | S/S |
| 36 | 0.25   | 0.0625   | S/S | 0.25  | 0.0625  | S/S | 0.125 | 0.03125   | S/S |
| 37 | 0.25   | 0.0625   | S/S | 0.25  | 0.0625  | S/S | 0.125 | 0.015625  | S/S |
| 38 | 0.0625 | 0.015625 | S/S | 0.125 | 0.03125 | S/S | 0.125 | 0.0078125 | S/S |
| 39 | 0.5    | 0.03125  | S/S | 0.25  | 0.03125 | S/S | 0.125 | 0.015625  | S/S |
| 40 | 0.25   | 0.03125  | S/S | 0.125 | 0.0625  | S/S | 0.125 | 0.015625  | S/S |
| 41 | 0.25   | 0.03125  | S/S | 0.25  | 0.0625  | S/S | 0.125 | 0.015625  | S/S |
| 42 | 0.5    | 0.125    | S/S | 0.25  | 0.0625  | S/S | 0.25  | 0.015625  | S/S |
| 43 | 0.125  | 0.03125  | S/S | 0.25  | 0.125   | S/S | 0.125 | 0.015625  | S/S |
| 44 | 0.25   | 0.0625   | S/S | 0.25  | 0.03125 | S/S | 0.125 | 0.015625  | S/S |
| 45 | 0.25   | 0.0625   | S/S | 0.25  | 0.125   | S/S | 0.25  | 0.015625  | S/S |
| 46 | 0.25   | 0.03125  | S/S | 0.25  | 0.0625  | S/S | 0.25  | 0.015625  | S/S |
| 47 | 0.25   | 0.0625   | S/S | 0.5   | 0.0625  | S/S | 0.125 | 0.015625  | S/S |
| 48 | 0.25   | 0.0625   | S/S | 0.25  | 0.125   | S/S | 0.125 | 0.015625  | S/S |
| 49 | 0.25   | 0.03125  | S/S | 0.5   | 0.03125 | S/S | 0.125 | 0.0078125 | S/S |
| 50 | 0.25   | 0.0625   | S/S | 0.5   | 0.03125 | S/S | 0.25  | 0.015625  | S/S |
| 51 | 0.25   | 0.0625   | S/S | 0.25  | 0.0625  | S/S | 0.125 | 0.03125   | S/S |
| 52 | 0.25   | 0.03125  | S/S | 0.25  | 0.03125 | S/S | 0.125 | 0.015625  | S/S |
| 53 | 0.5    | 0.0625   | S/S | 0.25  | 0.0625  | S/S | 0.25  | 0.015625  | S/S |
| 54 | 0.5    | 0.03125  | S/S | 0.25  | 0.03125 | S/S | 0.25  | 0.0078125 | S/S |
| 55 | 1      | 0.25     | S/S | 0.25  | 0.5     | S/S | 0.25  | 0.0625    | S/S |
| 56 | 0.25   | 0.0625   | S/S | 0.25  | 0.125   | S/S | 0.125 | 0.015625  | S/S |
| 57 | 0.25   | 0.125    | S/S | 0.5   | 1       | S/S | 0.125 | 0.0625    | S/S |
| 58 | 0.5    | 0.0625   | S/S | 0.25  | 0.25    | S/S | 0.25  | 0.03125   | S/S |
| 59 | 0.25   | 0.5      | S/S | 0.125 | 0.5     | S/S | 0.125 | 0.1125    | S/S |
| 60 | 0.5    | 0.25     | S/S | 0.5   | 0.5     | S/S | 0.25  | 0.125     | S/S |
| 61 | 0.25   | 0.03125  | S/S | 0.25  | 0.03125 | S/S | 0.125 | 0.015625  | S/S |

MIC: Minimum Inhibitory Concentration, C: Category, E: EUCAST, M: Micronaut-AM, S: susceptible.
